# Supplementary material for: Modulation of Genetic Associations with Serum Urate Levels by Body-Mass-Index in Humans
Source: PLoS One. 2015 Mar 26;10(3):e0119752. doi: 10.1371/journal.pone.0119752 (PMC4374966; doi:10.1371/journal.pone.0119752)
Supplement: S7 Table — Effect differences were tested using a t test. All loci with SNP displaying a Pdiff < 10-5 are listed with representative index SNP of lowest P-value (the total number of SNPs with suggestive P-value per loci is listed in N suggestivSNPs column). Low MAF SNPs were filtered as in S5 Table. Additionally, Pdiff values for the 28 known urate loci [2] are listed with index SNP from the published data. Locus in bold indicates that the difference in effect size between BMI strata reached genome-wide significance. P-value in bold for the known urate loci are those reaching the nominal threshold of 0.05. Locus with asterix had index SNP with main effect reaching suggestive level of association (P < 10-5) in the BMI stratified urate GWAMA analysis (S5 Table). (XLS) [file pone.0119752.s011.xls]

## Sheet: S7Table
		Locus	index_SNP	chr	pos (b36)	npops	A1	blean	selean	bob	seob	Pdiff	NsuggestivSNPs
LEAN-OBESE-Men	Candidate locus; MAF >5%	5' of CDA	rs2072671	1	20788288	21	C	-0.0848028	0.020565	0.0518333	0.0222671	5.76141e-06	1
	Candidate locus; MAF >5%	GRM7-LMCD1_AS1*	rs1825500	3	7991955	21	C	-0.128809	0.0284979	0.0577468	0.0309381	8.12652e-06	1
	Candidate locus; MAF >5%	FHIT	rs452203	3	60438514	21	T	-0.0556515	0.0198584	0.0790666	0.0219047	4.56525e-06	2
	Candidate locus; MAF >5%	CKMT2;CKMT2_AS1;ZCCHC9	rs12516414	5	80629148	21	G	0.0541247	0.0204682	-0.0855756	0.0231867	5.52121e-06	8
	Candidate locus; MAF >5%	ARL5B-PLXDC2	rs12146401	10	19803483	21	G	0.1462	0.0384214	-0.149418	0.0408451	1.13611e-07	12
	Candidate locus; MAF >5%	ETV6	rs3802993	12	11818798	8	G	0.182274	0.054418	-0.162516	0.055649	8.32949e-06	1
	Candidate locus; MAF >5%	PDE6H-RERG	rs2058784	12	15126440	20	C	-0.0780909	0.0200799	0.0549071	0.0223536	8.47821e-06	1
	Candidate locus; MAF >5%	LASS3	rs4965660	15	98817173	21	G	0.0755553	0.0198614	-0.078052	0.0222488	2.20323e-07	17
	Candidate locus; MAF >5%	FAM86A-RBFOX1	rs17138059	16	5551064	21	T	0.0681869	0.0218371	-0.0787188	0.0240228	5.30671e-06	8
	Candidate locus; MAF >5%	PLCG2	rs7199941	16	80463924	21	G	0.0548	0.0198502	-0.0828934	0.0217836	2.59903e-06	3
	Candidate locus; MAF >5%	SLC7A9-CEP89	rs7254267	19	38057674	21	G	-0.049838	0.0237091	0.113312	0.0257335	2.722e-06	5
	Candidate locus; MAF<5%	5' of GABRG1	rs904154	4	45821128	17	C	0.196924	0.0693939	-0.257368	0.067624	2.39554e-06	35
	known locus	PDZK1	rs1471633	1	144435096	21	C	-0.0560013	0.0198958	-0.0241862	0.0213653	0.272935	NA
	known locus	GCKR	rs1260326	2	27584444	21	C	-0.0509626	0.0194462	-0.0808256	0.0217603	0.30328	NA
	known locus	SLC2A9	rs12498742	4	9553150	21	G	-0.235573	0.0218385	-0.188809	0.0249954	0.156385	NA
	known locus	ABCG2	rs2231142	4	89271347	21	G	-0.314554	0.0322886	-0.140096	0.0352827	0.000242908	NA
	known locus	RRBE1	rs675209	6	7047083	21	C	-0.023875	0.022033	-0.04982	0.0244916	0.428196	NA
	known locus	SLC17A1-A3	rs1165151	6	25929595	21	G	0.0710624	0.0192119	0.0649957	0.021091	0.830605	NA
	known locus	SLC16A9	rs1171614	10	61139544	21	C	0.0325706	0.0277055	0.112039	0.0298454	0.0496225	NA
	known locus	SLC22A11	rs2078267	11	64090690	20	C	0.0540557	0.0192455	0.0516674	0.0213858	0.933448	NA
	known locus	NRXN2-SLC22A12	rs478607	11	64234639	21	G	0.085825	0.0262902	0.0113755	0.0304867	0.0628282	NA
	known locus	INHBC-INHBE	rs3741414	12	56130316	21	C	0.0738103	0.0243305	0.0753411	0.0273944	0.966475	NA
	known locus	TRIM46	rs11264341	1	153418117	21	C	0.0165922	0.0205684	0.0582304	0.022426	0.16865	NA
	known locus	INHBB	rs17050272	2	121022910	20	G	-0.0501101	0.0232498	-0.0441205	0.0240307	0.856987	NA
	known locus	SFMBT1	rs6770152	3	53075254	21	G	0.0161507	0.0193855	0.00603334	0.0216197	0.725958	NA
	known locus	TMEM171	rs17632159	5	72467238	20	C	-0.075257	0.0216489	-0.0146488	0.0233047	0.0552537	NA
	known locus	VEGFA	rs729761	6	43912549	21	G	0.0102079	0.0223948	0.034039	0.0242631	0.467783	NA
	known locus	BAZ1B-MLXIPL	rs1178977	7	72494985	21	G	-0.056961	0.0251401	-0.0756779	0.0278753	0.61594	NA
	known locus	PRKAG2	rs10480300	7	151036938	21	C	-0.0144756	0.0210256	0.0253118	0.0234704	0.204002	NA
	known locus	STC1	rs17786744	8	23832951	21	G	0.0442399	0.0193719	-0.0246402	0.0213193	0.0161483	NA
	known locus	HNF4G	rs2941484	8	76641323	21	C	-0.0455767	0.0189708	-0.0294543	0.0215383	0.572015	NA
	known locus	A1CF	rs10821905	10	52316099	21	G	-0.0282128	0.024734	-0.0341641	0.0289087	0.874964	NA
	known locus	ATXN2	rs653178	12	110492139	21	C	0.0421567	0.0193862	0.031539	0.021815	0.714366	NA
	known locus	UBE2Q2/NRG4	rs1394125	15	73946038	21	G	-0.0486118	0.0221449	-0.0997265	0.0247639	0.121659	NA
	known locus	IGFR1	rs6598541	15	97088658	21	G	-0.0394948	0.0204103	-0.0147323	0.0224967	0.412155	NA
	known locus	NFAT5	rs7193778	16	68121391	21	C	0.0290363	0.0286399	-0.00309871	0.0311604	0.444955	NA
	known locus	MAF	rs7188445	16	78292488	21	G	0.0126422	0.0201895	0.0253226	0.0223958	0.672248	NA
	known locus	HLF	rs7224610	17	50719787	21	C	0.0461618	0.0195124	0.0557781	0.0212834	0.737589	NA
	known locus	ACVR1B/ACVRL1	rs7976059	12	50537539	21	G	-0.0378629	0.0207549	-0.0528361	0.0228884	0.625889	NA
	known locus	B3GNT4	rs7953704	12	121191945	21	G	-0.0186337	0.0196588	0.0301198	0.0214718	0.0920355	NA
LEAN-OBESE-Women	Candidate locus; MAF >5%	5' LOC284661	rs2130620	1	4371744	20	C	0.0996771	0.0231571	-0.101898	0.034155	8.83315e-07	2
	Candidate locus; MAF >5%	CHI3L2	rs2251715	1	111579710	21	G	0.0419595	0.0142362	-0.0739255	0.0211962	4.93813e-06	3
	Candidate locus; MAF >5%	TSN-CNTNAP5	rs17007552	2	122811477	21	G	-0.0534907	0.0164648	0.0780664	0.024608	7.76984e-06	3
	Candidate locus; MAF >5%	FHIT	rs1385713	3	59833690	21	G	0.0372583	0.0173132	-0.10791	0.0259832	2.88497e-06	4
	Candidate locus; MAF >5%	5' of CTXN3	rs13175595	5	127008599	21	C	-0.0506028	0.0208999	0.11975	0.0320443	7.43896e-06	2
	Candidate locus; MAF >5%	CDCA7L-RAPGEF5*	rs7783529	7	21993737	21	C	0.0194516	0.0159705	-0.106619	0.0230143	5.91576e-06	1
	Candidate locus; MAF >5%	POU6F2	rs7779853	7	39024266	21	G	-0.0427221	0.0141276	0.072414	0.0211314	5.15852e-06	2
	Candidate locus; MAF >5%	LUZP2-ANO3	rs7104060	11	25384406	21	G	-0.0467919	0.0171228	0.0916394	0.0251228	4.59956e-06	1
	Candidate locus; MAF >5%	RBFOX3*	rs1000791	17	74777473	20	T	0.0429613	0.0286566	-0.208561	0.0410737	4.31531e-07	5
	Candidate locus; MAF >5%	loc100505817-FBXO15	rs7230191	18	69547506	21	G	-0.0461781	0.0213655	0.131899	0.0321079	3.375e-06	3
	known locus	PDZK1	rs1471633	1	144435096	20	C	-0.017183	0.0152112	-0.0573985	0.0221481	0.131983	NA
	known locus	GCKR	rs1260326	2	27584444	21	C	-0.0481057	0.0143395	-0.0728169	0.0214852	0.335694	NA
	known locus	SLC2A9	rs12498742	4	9553150	21	G	-0.416481	0.0162343	-0.424773	0.0243433	0.775493	NA
	known locus	ABCG2	rs2231142	4	89271347	21	G	-0.172869	0.0239732	-0.114416	0.0365556	0.178452	NA
	known locus	RRBE1	rs675209	6	7047083	21	C	-0.0550351	0.0164502	-0.0448552	0.024597	0.729191	NA
	known locus	SLC17A1-A3	rs1165151	6	25929595	21	G	0.0914666	0.0140994	0.0403429	0.021253	0.0436793	NA
	known locus	SLC16A9	rs1171614	10	61139544	21	C	0.0878441	0.0208401	0.0452606	0.0311514	0.252879	NA
	known locus	SLC22A11	rs2078267	11	64090690	20	C	0.0777102	0.0143526	0.0381287	0.0216044	0.124614	NA
	known locus	NRXN2-SLC22A12	rs478607	11	64234639	21	G	0.0222405	0.0195507	0.0689047	0.0307261	0.197299	NA
	known locus	INHBC-INHBE	rs3741414	12	56130316	21	C	0.0572333	0.0179843	0.0797195	0.0268731	0.484049	NA
	known locus	TRIM46	rs11264341	1	153418117	21	C	0.0135971	0.0151543	0.0592367	0.0224187	0.0896344	NA
	known locus	INHBB	rs17050272	2	121022910	19	G	-0.0315807	0.0187419	-0.05498	0.0252896	0.454309	NA
	known locus	SFMBT1	rs6770152	3	53075254	21	G	0.0575516	0.014328	0.0282711	0.0212338	0.250007	NA
	known locus	TMEM171	rs17632159	5	72467238	19	C	-0.0281217	0.0170653	-0.0326782	0.0245582	0.878126	NA
	known locus	VEGFA	rs729761	6	43912549	21	G	0.0225566	0.0164037	0.0852819	0.0245006	0.0322856	NA
	known locus	BAZ1B-MLXIPL	rs1178977	7	72494985	21	G	-0.0306983	0.0186628	-0.0279102	0.0274664	0.932662	NA
	known locus	PRKAG2	rs10480300	7	151036938	21	C	-0.00781066	0.0157656	-0.0264507	0.0235174	0.507629	NA
	known locus	STC1	rs17786744	8	23832951	21	G	0.0319518	0.0143492	0.0128258	0.0212307	0.452573	NA
	known locus	HNF4G	rs2941484	8	76641323	21	C	-0.0477418	0.0142044	-0.0302965	0.0212924	0.492782	NA
	known locus	A1CF	rs10821905	10	52316099	21	G	-0.0725658	0.0185187	-0.0613688	0.0281384	0.738008	NA
	known locus	ATXN2	rs653178	12	110492139	21	C	0.0488962	0.0144832	0.0359884	0.021473	0.616	NA
	known locus	UBE2Q2/NRG4	rs1394125	15	73946038	21	G	-0.0337432	0.0163866	-0.0342649	0.0246549	0.985852	NA
	known locus	IGFR1	rs6598541	15	97088658	21	G	-0.0350002	0.0151024	-0.0339547	0.0226702	0.969192	NA
	known locus	NFAT5	rs7193778	16	68121391	21	C	0.07615	0.0207995	0.0315064	0.0312279	0.231163	NA
	known locus	MAF	rs7188445	16	78292488	21	G	0.0383676	0.0150138	0.031438	0.0225382	0.796792	NA
	known locus	HLF	rs7224610	17	50719787	21	C	0.0445699	0.0144419	0.0647762	0.0214751	0.432018	NA
	known locus	ACVR1B/ACVRL1	rs7976059	12	50537539	21	G	-0.00834962	0.0152971	-0.0228745	0.0232875	0.59987	NA
	known locus	B3GNT4	rs7953704	12	121191945	21	G	0.037256	0.0144866	0.0252959	0.0217983	0.645624	NA
LEAN-OBESE-All	Candidate locus; MAF >5%	5' of ELTD1	rs17448661	1	79355618	21	G	0.0433953	0.0159757	-0.0761266	0.0205988	3.7078e-06	1
	Candidate locus; MAF >5%	ERO1LB-EDARADD	rs12734378	1	234577977	21	C	0.0383086	0.0118597	-0.0537659	0.0148562	1.0166e-06	8
	Candidate locus; MAF >5%	FHIT	rs669229	3	59835815	21	C	-0.0523232	0.0190853	0.0918474	0.0245771	2.9297e-06	3
	Candidate locus; MAF >5%	3' of CTNND2	rs852560	5	10990683	21	G	-0.0427412	0.0189904	0.091784	0.0235842	7.3282e-06	1
	Candidate locus; MAF >5%	CKMT2;CKMT2_AS1;ZCCHC9	rs4704717	5	80587179	21	G	-0.0330271	0.012588	0.0604549	0.0162231	4.34124e-06	8
	Candidate locus; MAF >5%	GLRX	rs3777209	5	95179712	21	C	0.0466489	0.0258329	-0.137008	0.0328151	9.07543e-06	1
	Candidate locus; MAF >5%	GRIN3A-CYLC2	rs2146795	9	104086747	21	G	0.0975139	0.0327398	-0.120113	0.0371313	9.10007e-06	1
	Candidate locus; MAF >5%	ARL5B-PLXDC2	rs12146401	10	19803483	21	G	0.0621135	0.0238976	-0.112772	0.0296499	3.57058e-06	3
	Candidate locus; MAF >5%	CCDC81;3' of ME3	rs4944571	11	85786122	21	G	0.0194649	0.012713	-0.0717007	0.0161405	7.53293e-06	2
	Candidate locus; MAF >5%	RBFOX3*	rs4789996	17	74794825	20	G	-0.0756665	0.0244909	0.124247	0.0314866	4.2445e-07	3
	Candidate locus; MAF >5%	PTPRT	rs2273072	20	40668813	21	C	0.0215734	0.0152414	-0.0855762	0.0191232	9.77094e-06	1
	Candidate locus; MAF >5%	CELSR1-GRAMD4	rs875778	22	45362970	21	C	-0.0290931	0.0130001	0.0697216	0.0163675	1.83182e-06	2
	Candidate locus; MAF<5%	UBR3;MYO3B;SP5*	rs16858164	2	170898363	18	G	-0.0574824	0.0415146	0.253205	0.0537593	3.91086e-06	5
	Candidate locus; MAF<5%	TPN1-DIRC3	rs1921986	2	217537101	21	C	0.105194	0.029258	-0.101749	0.0367695	8.80108e-06	3
	Candidate locus; MAF<5%	ABCC4;CLDN10;DZIP1;DNAJC3	rs7319175	13	94819184	16	C	0.0863478	0.0528135	-0.312905	0.0738778	9.17321e-06	1
	known locus	PDZK1	rs1471633	1	144435096	21	C	-0.0316381	0.0119888	-0.0417601	0.0150529	0.595522	NA
	known locus	GCKR	rs1260326	2	27584444	21	C	-0.0473084	0.0117978	-0.0801939	0.015193	0.0844732	NA
	known locus	SLC2A9	rs12498742	4	9553150	21	G	-0.326389	0.0133526	-0.299313	0.0174279	0.213294	NA
	known locus	ABCG2	rs2231142	4	89271347	21	G	-0.223264	0.0197836	-0.134653	0.0254206	0.00550061	NA
	known locus	RRBE1	rs675209	6	7047083	21	C	-0.0371303	0.0134962	-0.0418011	0.0171431	0.828947	NA
	known locus	SLC17A1-A3	rs1165151	6	25929595	21	G	0.0802307	0.0116382	0.0518292	0.0149543	0.130386	NA
	known locus	SLC16A9	rs1171614	10	61139544	21	C	0.057157	0.0174482	0.0648111	0.0214281	0.779817	NA
	known locus	SLC22A11	rs2078267	11	64090690	20	C	0.063609	0.0118057	0.0417562	0.0151384	0.250649	NA
	known locus	NRXN2-SLC22A12	rs478607	11	64234639	21	G	0.046688	0.0160388	0.0310809	0.0213837	0.555737	NA
	known locus	INHBC-INHBE	rs3741414	12	56130316	21	C	0.0514808	0.0147495	0.0734029	0.0190002	0.357693	NA
	known locus	TRIM46	rs11264341	1	153418117	21	C	0.00939174	0.0125278	0.0642881	0.0157143	0.00583651	NA
	known locus	INHBB	rs17050272	2	121022910	20	G	-0.0413476	0.0144948	-0.0422513	0.0171686	0.967617	NA
	known locus	SFMBT1	rs6770152	3	53075254	21	G	0.0401846	0.0118076	0.0209902	0.0150411	0.31105	NA
	known locus	TMEM171	rs17632159	5	72467238	20	C	-0.0493936	0.0132595	-0.0210516	0.0165174	0.176867	NA
	known locus	VEGFA	rs729761	6	43912549	21	G	0.018323	0.0136483	0.0546215	0.0172767	0.0961452	NA
	known locus	BAZ1B-MLXIPL	rs1178977	7	72494985	21	G	-0.0368608	0.0153655	-0.0550372	0.0194254	0.45891	NA
	known locus	PRKAG2	rs10480300	7	151036938	21	C	-0.0147957	0.0129161	0.00503983	0.0165284	0.339929	NA
	known locus	STC1	rs17786744	8	23832951	21	G	0.0417866	0.0118395	-0.00559635	0.0149237	0.0120631	NA
	known locus	HNF4G	rs2941484	8	76641323	21	C	-0.0445165	0.011674	-0.0331828	0.0150782	0.548638	NA
	known locus	A1CF	rs10821905	10	52316099	21	G	-0.0596276	0.0151807	-0.0420945	0.0200976	0.482384	NA
	known locus	ATXN2	rs653178	12	110492139	21	C	0.0406569	0.011921	0.0309431	0.0151043	0.610417	NA
	known locus	UBE2Q2/NRG4	rs1394125	15	73946038	21	G	-0.0311684	0.0135902	-0.0751434	0.0172959	0.0436325	NA
	known locus	IGFR1	rs6598541	15	97088658	21	G	-0.0360464	0.0124067	-0.0196938	0.0158766	0.412764	NA
	known locus	NFAT5	rs7193778	16	68121391	21	C	0.05371	0.017291	0.0121024	0.0218388	0.131684	NA
	known locus	MAF	rs7188445	16	78292488	21	G	0.0239678	0.0123495	0.0283264	0.0157323	0.825923	NA
	known locus	HLF	rs7224610	17	50719787	21	C	0.0415757	0.0118919	0.062463	0.0150812	0.27239	NA
	known locus	ACVR1B/ACVRL1	rs7976059	12	50537539	21	G	-0.0191963	0.0126344	-0.0315735	0.0161885	0.543009	NA
	known locus	B3GNT4	rs7953704	12	121191945	21	G	0.00633544	0.0119263	0.0303125	0.0151051	0.208637	NA
LEAN-OVERWEIGHT-Men	Candidate locus; MAF >5%	RBMS1-TANK	rs1829975	2	161493415	21	C	0.116687	0.0286715	-0.0806484	0.0226075	4.70765e-08	1
	Candidate locus; MAF >5%	c2orf47-SPATS2L*	rs13016744	2	200617768	21	T	0.178251	0.0387307	-0.0620098	0.0297139	6.56875e-07	2
	Candidate locus; MAF >5%	MARCH1-TRIM61	rs9790550	4	165779513	16	C	-0.115886	0.033955	0.0773315	0.0258251	4.7193e-06	1
	Candidate locus; MAF >5%	5' of EDN1	rs9357336	6	12392025	21	G	-0.107869	0.0248287	0.0295154	0.018932	8.73056e-06	3
	Candidate locus; MAF >5%	5' of TSPYL5	rs16895559	8	98424700	21	C	-0.184279	0.0420115	0.0997631	0.0334867	9.12678e-08	7
	Candidate locus; MAF >5%	MED30-EXT1*	rs3134395	8	118795341	21	G	-0.0653948	0.0196889	0.0475884	0.014593	3.18769e-06	6
	Candidate locus; MAF >5%	3' BLID	rs7948894	11	121419157	21	C	-0.0826407	0.0220106	0.0537346	0.0164578	5.32818e-07	13
	Candidate locus; MAF >5%	MYO18B*	rs5761340	22	24719349	21	C	0.0639297	0.0194766	-0.0480081	0.0145415	3.26297e-06	6
	Candidate locus; MAF<5%	ZNF326-BARHL2	rs7522830	1	90680464	17	C	0.164686	0.0553666	-0.149354	0.0440829	7.30721e-06	1
	Candidate locus; MAF<5%	FAM98B	rs12913860	15	36539245	20	C	0.269938	0.0658194	-0.107177	0.050723	4.51352e-06	1
	known locus	PDZK1	rs1471633	1	144435096	21	C	-0.0560013	0.0198958	-0.0683808	0.0143602	0.610221	NA
	known locus	GCKR	rs1260326	2	27584444	21	C	-0.0509626	0.0194462	-0.064722	0.0143239	0.564863	NA
	known locus	SLC2A9	rs12498742	4	9553150	21	G	-0.235573	0.0218385	-0.17222	0.0168955	0.0204105	NA
	known locus	ABCG2	rs2231142	4	89271347	21	G	-0.314554	0.0322886	-0.243572	0.0244341	0.0764908	NA
	known locus	RRBE1	rs675209	6	7047083	21	C	-0.023875	0.022033	-0.0467646	0.0168201	0.404021	NA
	known locus	SLC17A1-A3	rs1165151	6	25929595	21	G	0.0710624	0.0192119	0.0844335	0.0142541	0.572223	NA
	known locus	SLC16A9	rs1171614	10	61139544	21	C	0.0325706	0.0277055	0.058079	0.0212531	0.460381	NA
	known locus	SLC22A11	rs2078267	11	64090690	20	C	0.0540557	0.0192455	0.07163	0.014458	0.460662	NA
	known locus	NRXN2-SLC22A12	rs478607	11	64234639	21	G	0.085825	0.0262902	0.0847557	0.0196616	0.973744	NA
	known locus	INHBC-INHBE	rs3741414	12	56130316	21	C	0.0738103	0.0243305	0.0895952	0.0178051	0.596804	NA
	known locus	TRIM46	rs11264341	1	153418117	21	C	0.0165922	0.0205684	0.0430896	0.0152306	0.295503	NA
	known locus	INHBB	rs17050272	2	121022910	20	G	-0.0501101	0.0232498	-0.0399957	0.0170251	0.722857	NA
	known locus	SFMBT1	rs6770152	3	53075254	21	G	0.0161507	0.0193855	0.0343137	0.0144247	0.447533	NA
	known locus	TMEM171	rs17632159	5	72467238	20	C	-0.075257	0.0216489	-0.0334223	0.0160937	0.117102	NA
	known locus	VEGFA	rs729761	6	43912549	21	G	0.0102079	0.0223948	0.0225959	0.0166586	0.65381	NA
	known locus	BAZ1B-MLXIPL	rs1178977	7	72494985	21	G	-0.056961	0.0251401	-0.0520547	0.018829	0.874581	NA
	known locus	PRKAG2	rs10480300	7	151036938	21	C	-0.0144756	0.0210256	-0.0356113	0.0158807	0.417614	NA
	known locus	STC1	rs17786744	8	23832951	21	G	0.0442399	0.0193719	0.022479	0.0143431	0.361648	NA
	known locus	HNF4G	rs2941484	8	76641323	21	C	-0.0455767	0.0189708	-0.0362027	0.014673	0.692851	NA
	known locus	A1CF	rs10821905	10	52316099	21	G	-0.0282128	0.024734	-0.0315977	0.0188075	0.912344	NA
	known locus	ATXN2	rs653178	12	110492139	21	C	0.0421567	0.0193862	0.0165173	0.0146773	0.286638	NA
	known locus	UBE2Q2/NRG4	rs1394125	15	73946038	21	G	-0.0486118	0.0221449	-0.057842	0.0167225	0.736782	NA
	known locus	IGFR1	rs6598541	15	97088658	21	G	-0.0394948	0.0204103	-0.0329709	0.0153098	0.796116	NA
	known locus	NFAT5	rs7193778	16	68121391	21	C	0.0290363	0.0286399	-0.00954852	0.0206424	0.26948	NA
	known locus	MAF	rs7188445	16	78292488	21	G	0.0126422	0.0201895	-0.000783726	0.0153046	0.592294	NA
	known locus	HLF	rs7224610	17	50719787	21	C	0.0461618	0.0195124	0.0375514	0.0146276	0.721256	NA
	known locus	ACVR1B/ACVRL1	rs7976059	12	50537539	21	G	-0.0378629	0.0207549	-0.036156	0.0152881	0.946654	NA
	known locus	B3GNT4	rs7953704	12	121191945	21	G	-0.0186337	0.0196588	0.0130078	0.0146327	0.192017	NA
LEAN-OVERWEIGHT-Women	Candidate locus; MAF >5%	5' BARHL2	rs7527440	1	91006714	21	T	0.0425437	0.015835	-0.0757198	0.0186973	1.10981e-06	7
	Candidate locus; MAF >5%	ACVR1C	rs12993800	2	158097025	21	C	-0.0575586	0.0212695	0.0975486	0.0254964	2.42598e-06	1
	Candidate locus; MAF >5%	SP140L	rs6710287	2	230939595	21	C	-0.0467939	0.0146702	0.0555898	0.0177245	7.10153e-06	1
	Candidate locus; MAF >5%	5' of ZNF385D	rs2630787	3	21847339	21	C	0.0483325	0.0142431	-0.048823	0.0166119	7.43417e-06	2
	Candidate locus; MAF >5%	BMPER	rs1427483	7	33925764	21	G	0.048089	0.0151508	-0.0552877	0.0180136	9.32715e-06	1
	Candidate locus; MAF >5%	ADIPOR2*	rs12230440	12	1727214	21	G	-0.0870516	0.0190639	0.0515879	0.0226442	2.2822e-06	2
	Candidate locus; MAF >5%	5' of TBX3	rs11067278	12	113668436	21	C	0.0372623	0.0153602	-0.0851246	0.0180454	1.86772e-07	2
	Candidate locus; MAF >5%	UNC13C	rs4283168	15	52293851	21	C	-0.0322132	0.015776	0.0797312	0.0189251	4.53635e-06	2
	Candidate locus; MAF >5%	PAX1-FOXA2	rs6048110	20	22389996	21	G	-0.0388851	0.0178197	0.087967	0.0214099	4.31359e-06	1
	Candidate locus; MAF<5%	FRRS1;AGL	rs17121466	1	100113415	19	C	0.137629	0.0467719	-0.202307	0.0581986	4.34205e-06	2
	Candidate locus; MAF<5%	NCOA1;CENPO;ADCY3	rs12328668	2	24578793	20	G	0.189237	0.0445348	-0.116925	0.053757	9.60328e-06	1
	known locus	PDZK1	rs1471633	1	144435096	20	C	-0.017183	0.0152112	-0.0490893	0.0178312	0.169491	NA
	known locus	GCKR	rs1260326	2	27584444	21	C	-0.0481057	0.0143395	-0.0442137	0.0173079	0.86128	NA
	known locus	SLC2A9	rs12498742	4	9553150	21	G	-0.416481	0.0162343	-0.430645	0.0193476	0.571409	NA
	known locus	ABCG2	rs2231142	4	89271347	21	G	-0.172869	0.0239732	-0.189557	0.0283766	0.650282	NA
	known locus	RRBE1	rs675209	6	7047083	21	C	-0.0550351	0.0164502	-0.0398093	0.019905	0.55183	NA
	known locus	SLC17A1-A3	rs1165151	6	25929595	21	G	0.0914666	0.0140994	0.0841725	0.0167783	0.736964	NA
	known locus	SLC16A9	rs1171614	10	61139544	21	C	0.0878441	0.0208401	0.0773595	0.0250079	0.745159	NA
	known locus	SLC22A11	rs2078267	11	64090690	20	C	0.0777102	0.0143526	0.0611151	0.0171649	0.454165	NA
	known locus	NRXN2-SLC22A12	rs478607	11	64234639	21	G	0.0222405	0.0195507	0.0425874	0.0230736	0.497158	NA
	known locus	INHBC-INHBE	rs3741414	12	56130316	21	C	0.0572333	0.0179843	0.0618299	0.0216901	0.869233	NA
	known locus	TRIM46	rs11264341	1	153418117	21	C	0.0135971	0.0151543	0.00307115	0.0181311	0.653051	NA
	known locus	INHBB	rs17050272	2	121022910	19	G	-0.0315807	0.0187419	-0.0415164	0.021722	0.726708	NA
	known locus	SFMBT1	rs6770152	3	53075254	21	G	0.0575516	0.014328	0.0390806	0.0171026	0.403453	NA
	known locus	TMEM171	rs17632159	5	72467238	19	C	-0.0281217	0.0170653	-0.0137174	0.01966	0.576569	NA
	known locus	VEGFA	rs729761	6	43912549	21	G	0.0225566	0.0164037	0.0583169	0.0198326	0.160873	NA
	known locus	BAZ1B-MLXIPL	rs1178977	7	72494985	21	G	-0.0306983	0.0186628	-0.0234339	0.0219878	0.799341	NA
	known locus	PRKAG2	rs10480300	7	151036938	21	C	-0.00781066	0.0157656	0.0140809	0.0187254	0.366776	NA
	known locus	STC1	rs17786744	8	23832951	21	G	0.0319518	0.0143492	-0.00529326	0.0171367	0.092635	NA
	known locus	HNF4G	rs2941484	8	76641323	21	C	-0.0477418	0.0142044	-0.0520917	0.0172588	0.844309	NA
	known locus	A1CF	rs10821905	10	52316099	21	G	-0.0725658	0.0185187	-0.0602231	0.0221491	0.666151	NA
	known locus	ATXN2	rs653178	12	110492139	21	C	0.0488962	0.0144832	0.0531951	0.0172159	0.847088	NA
	known locus	UBE2Q2/NRG4	rs1394125	15	73946038	21	G	-0.0337432	0.0163866	0.0105644	0.019454	0.0787589	NA
	known locus	IGFR1	rs6598541	15	97088658	21	G	-0.0350002	0.0151024	-0.0308741	0.0182263	0.860365	NA
	known locus	NFAT5	rs7193778	16	68121391	21	C	0.07615	0.0207995	0.01295	0.0248822	0.049224	NA
	known locus	MAF	rs7188445	16	78292488	21	G	0.0383676	0.0150138	0.0407444	0.0178696	0.918145	NA
	known locus	HLF	rs7224610	17	50719787	21	C	0.0445699	0.0144419	0.0151222	0.0172411	0.186385	NA
	known locus	ACVR1B/ACVRL1	rs7976059	12	50537539	21	G	-0.00834962	0.0152971	-0.00433729	0.0183888	0.865577	NA
	known locus	B3GNT4	rs7953704	12	121191945	21	G	0.037256	0.0144866	0.0492927	0.0171364	0.58827	NA
LEAN-OVERWEIGHT-All	Candidate locus; MAF >5%	LRP1B	rs4335888	2	141947510	21	C	-0.0301598	0.0115409	0.0434469	0.0109888	2.63331e-06	25
	Candidate locus; MAF >5%	VIPR1	rs417387	3	42546550	21	C	-0.0430806	0.0126401	0.0372868	0.0117747	2.23078e-06	2
	Candidate locus; MAF >5%	3' of XKR4	rs7001195	8	56639652	21	C	0.0257002	0.0114942	-0.0439129	0.011026	8.79268e-06	1
	Candidate locus; MAF >5%	5' CTAGE1*	rs16967156	18	18264334	18	G	-0.0414478	0.0160314	0.0630024	0.0147912	1.11713e-06	2
	Candidate locus; MAF<5%	LINGO2-LOC401497	rs7022178	9	29770195	10	G	0.28277	0.0641007	-0.164602	0.0650715	6.31944e-07	5
	Candidate locus; MAF<5%	MAP3K8	rs8177061	10	30785310	11	G	-0.281832	0.0896871	0.26207	0.0736615	1.89195e-06	1
	known locus	PDZK1	rs1471633	1	144435096	21	C	-0.0316381	0.0119888	-0.0647024	0.011101	0.0395914	NA
	known locus	GCKR	rs1260326	2	27584444	21	C	-0.0473084	0.0117978	-0.0549405	0.0111401	0.632401	NA
	known locus	SLC2A9	rs12498742	4	9553150	21	G	-0.326389	0.0133526	-0.26995	0.0128694	0.001967	NA
	known locus	ABCG2	rs2231142	4	89271347	21	G	-0.223264	0.0197836	-0.215342	0.0187484	0.767544	NA
	known locus	RRBE1	rs675209	6	7047083	21	C	-0.0371303	0.0134962	-0.0417495	0.0129934	0.802002	NA
	known locus	SLC17A1-A3	rs1165151	6	25929595	21	G	0.0802307	0.0116382	0.0834888	0.0109509	0.835736	NA
	known locus	SLC16A9	rs1171614	10	61139544	21	C	0.057157	0.0174482	0.0706792	0.0163614	0.56534	NA
	known locus	SLC22A11	rs2078267	11	64090690	20	C	0.063609	0.0118057	0.0714371	0.011143	0.623848	NA
	known locus	NRXN2-SLC22A12	rs478607	11	64234639	21	G	0.046688	0.0160388	0.0706924	0.0150795	0.267464	NA
	known locus	INHBC-INHBE	rs3741414	12	56130316	21	C	0.0514808	0.0147495	0.0754169	0.0138471	0.228881	NA
	known locus	TRIM46	rs11264341	1	153418117	21	C	0.00939174	0.0125278	0.0325646	0.0117347	0.16978	NA
	known locus	INHBB	rs17050272	2	121022910	20	G	-0.0413476	0.0144948	-0.0362512	0.0132875	0.792111	NA
	known locus	SFMBT1	rs6770152	3	53075254	21	G	0.0401846	0.0118076	0.0329451	0.0111105	0.649749	NA
	known locus	TMEM171	rs17632159	5	72467238	20	C	-0.0493936	0.0132595	-0.0230133	0.0123487	0.1387	NA
	known locus	VEGFA	rs729761	6	43912549	21	G	0.018323	0.0136483	0.0320258	0.0128298	0.456903	NA
	known locus	BAZ1B-MLXIPL	rs1178977	7	72494985	21	G	-0.0368608	0.0153655	-0.0433759	0.0144147	0.753153	NA
	known locus	PRKAG2	rs10480300	7	151036938	21	C	-0.0147957	0.0129161	-0.012076	0.012233	0.87644	NA
	known locus	STC1	rs17786744	8	23832951	21	G	0.0417866	0.0118395	0.0135113	0.0110743	0.0761013	NA
	known locus	HNF4G	rs2941484	8	76641323	21	C	-0.0445165	0.011674	-0.0405256	0.0112817	0.802577	NA
	known locus	A1CF	rs10821905	10	52316099	21	G	-0.0596276	0.0151807	-0.0430652	0.0144341	0.421337	NA
	known locus	ATXN2	rs653178	12	110492139	21	C	0.0406569	0.011921	0.0212545	0.0112695	0.229037	NA
	known locus	UBE2Q2/NRG4	rs1394125	15	73946038	21	G	-0.0311684	0.0135902	-0.0302414	0.0128044	0.95973	NA
	known locus	IGFR1	rs6598541	15	97088658	21	G	-0.0360464	0.0124067	-0.0320403	0.0117859	0.811815	NA
	known locus	NFAT5	rs7193778	16	68121391	21	C	0.05371	0.017291	0.000426792	0.0159875	0.0213915	NA
	known locus	MAF	rs7188445	16	78292488	21	G	0.0239678	0.0123495	0.015692	0.0117217	0.621085	NA
	known locus	HLF	rs7224610	17	50719787	21	C	0.0415757	0.0118919	0.0269054	0.0112327	0.361741	NA
	known locus	ACVR1B/ACVRL1	rs7976059	12	50537539	21	G	-0.0191963	0.0126344	-0.0284468	0.0118436	0.586965	NA
	known locus	B3GNT4	rs7953704	12	121191945	21	G	0.00633544	0.0119263	0.026158	0.0112086	0.218051	NA
OVERWEIGHT-OBESE-Men	Candidate locus; MAF >5%	DMBX1-MKNK1_AS1*	rs17102247	1	46762059	21	C	-0.0553147	0.0342307	0.238444	0.0516745	1.78196e-06	2
	Candidate locus; MAF >5%	LAPTM4A-SDC1	rs4666369	2	20211305	21	G	0.0515702	0.0179695	-0.105201	0.0269946	1.10135e-06	1
	Candidate locus; MAF >5%	FIGN-GBR14	rs4441488	2	164773873	21	C	0.0520232	0.0157369	-0.0787332	0.0233034	2.77183e-06	23
	Candidate locus; MAF >5%	SHANK2	rs10899154	11	70072809	21	C	-0.0558268	0.0157586	0.0707663	0.0229086	4.44737e-06	3
	Candidate locus; MAF >5%	5' of KSR2	rs4766889	12	116888069	21	C	-0.0561039	0.0144861	0.0625659	0.021115	2.99059e-06	3
	known locus	PDZK1	rs1471633	1	144435096	21	C	-0.0683808	0.0143602	-0.0241862	0.0213653	0.0835558	NA
	known locus	GCKR	rs1260326	2	27584444	21	C	-0.064722	0.0143239	-0.0808256	0.0217603	0.533276	NA
	known locus	SLC2A9	rs12498742	4	9553150	21	G	-0.17222	0.0168955	-0.188809	0.0249954	0.57943	NA
	known locus	ABCG2	rs2231142	4	89271347	21	G	-0.243572	0.0244341	-0.140096	0.0352827	0.0150811	NA
	known locus	RRBE1	rs675209	6	7047083	21	C	-0.0467646	0.0168201	-0.04982	0.0244916	0.91744	NA
	known locus	SLC17A1-A3	rs1165151	6	25929595	21	G	0.0844335	0.0142541	0.0649957	0.021091	0.441501	NA
	known locus	SLC16A9	rs1171614	10	61139544	21	C	0.058079	0.0212531	0.112039	0.0298454	0.137628	NA
	known locus	SLC22A11	rs2078267	11	64090690	20	C	0.07163	0.014458	0.0516674	0.0213858	0.435705	NA
	known locus	NRXN2-SLC22A12	rs478607	11	64234639	21	G	0.0847557	0.0196616	0.0113755	0.0304867	0.0414918	NA
	known locus	INHBC-INHBE	rs3741414	12	56130316	21	C	0.0895952	0.0178051	0.0753411	0.0273944	0.660158	NA
	known locus	TRIM46	rs11264341	1	153418117	21	C	0.0430896	0.0152306	0.0582304	0.022426	0.573455	NA
	known locus	INHBB	rs17050272	2	121022910	20	G	-0.0399957	0.0170251	-0.0441205	0.0240307	0.887717	NA
	known locus	SFMBT1	rs6770152	3	53075254	21	G	0.0343137	0.0144247	0.00603334	0.0216197	0.272756	NA
	known locus	TMEM171	rs17632159	5	72467238	20	C	-0.0334223	0.0160937	-0.0146488	0.0233047	0.504015	NA
	known locus	VEGFA	rs729761	6	43912549	21	G	0.0225959	0.0166586	0.034039	0.0242631	0.695118	NA
	known locus	BAZ1B-MLXIPL	rs1178977	7	72494985	21	G	-0.0520547	0.018829	-0.0756779	0.0278753	0.479039	NA
	known locus	PRKAG2	rs10480300	7	151036938	21	C	-0.0356113	0.0158807	0.0253118	0.0234704	0.0302367	NA
	known locus	STC1	rs17786744	8	23832951	21	G	0.022479	0.0143431	-0.0246402	0.0213193	0.0645512	NA
	known locus	HNF4G	rs2941484	8	76641323	21	C	-0.0362027	0.014673	-0.0294543	0.0215383	0.794083	NA
	known locus	A1CF	rs10821905	10	52316099	21	G	-0.0315977	0.0188075	-0.0341641	0.0289087	0.940217	NA
	known locus	ATXN2	rs653178	12	110492139	21	C	0.0165173	0.0146773	0.031539	0.021815	0.564712	NA
	known locus	UBE2Q2/NRG4	rs1394125	15	73946038	21	G	-0.057842	0.0167225	-0.0997265	0.0247639	0.1577	NA
	known locus	IGFR1	rs6598541	15	97088658	21	G	-0.0329709	0.0153098	-0.0147323	0.0224967	0.499299	NA
	known locus	NFAT5	rs7193778	16	68121391	21	C	-0.00954852	0.0206424	-0.00309871	0.0311604	0.861927	NA
	known locus	MAF	rs7188445	16	78292488	21	G	-0.000783726	0.0153046	0.0253226	0.0223958	0.331989	NA
	known locus	HLF	rs7224610	17	50719787	21	C	0.0375514	0.0146276	0.0557781	0.0212834	0.476824	NA
	known locus	ACVR1B/ACVRL1	rs7976059	12	50537539	21	G	-0.036156	0.0152881	-0.0528361	0.0228884	0.541326	NA
	known locus	B3GNT4	rs7953704	12	121191945	21	G	0.0130078	0.0146327	0.0301198	0.0214718	0.506802	NA
OVERWEIGHT-OBESE-Women	Candidate locus; MAF >5%	3' of SYF2*	rs10158481	1	25370379	21	T	-0.0300378	0.0194226	0.113135	0.0240572	3.17913e-06	3
	Candidate locus; MAF >5%	BMP10-GKN2	rs12473663	2	68993068	9	C	-0.0817287	0.0262199	0.106343	0.0314056	3.74097e-06	1
	Candidate locus; MAF >5%	5' HAVCR1	rs12516270	5	156420050	21	G	0.0651057	0.0237127	-0.113241	0.0291077	1.75778e-06	2
	Candidate locus; MAF >5%	5' of CDCA7L*	rs7783529	7	21993737	21	C	0.0283409	0.0180008	-0.106619	0.0230143	3.36591e-06	1
	Candidate locus; MAF >5%	c8orf48-SGCZ	rs17236260	8	13559969	17	G	-0.119549	0.0516341	0.257172	0.0661504	6.28715e-06	1
	Candidate locus; MAF >5%	FRMD3	rs11140085	9	85234640	21	C	-0.132493	0.0313761	0.0819957	0.0369115	8.39638e-06	1
	Candidate locus; MAF >5%	PRRX2-PTGES	rs11795092	9	131529174	21	G	0.0559634	0.0248248	-0.12724	0.0308463	3.23633e-06	6
	Candidate locus; MAF >5%	c10orf11	rs11001590	10	77452947	21	G	0.0394818	0.0170103	-0.0843956	0.0212571	4.697e-06	18
	Candidate locus; MAF<5%	c3orf38-EPHA3	rs13080544	3	88851612	13	C	-0.117294	0.0794414	0.443865	0.0926431	3.71694e-06	1
	Candidate locus; MAF<5%	GPR123	rs11101927	10	134764991	8	C	-0.890497	0.232659	0.569811	0.217539	3.96266e-06	1
	Candidate locus; MAF<5%	TRPC6-ANGPTL5	rs11225019	11	101200000	16	C	-0.241201	0.0798372	0.374995	0.108477	4.17895e-06	1
	known locus	PDZK1	rs1471633	1	144435096	20	C	-0.0490893	0.0178312	-0.0573985	0.0221481	0.768748	NA
	known locus	GCKR	rs1260326	2	27584444	21	C	-0.0442137	0.0173079	-0.0728169	0.0214852	0.29691	NA
	known locus	SLC2A9	rs12498742	4	9553150	21	G	-0.430645	0.0193476	-0.424773	0.0243433	0.849314	NA
	known locus	ABCG2	rs2231142	4	89271347	21	G	-0.189557	0.0283766	-0.114416	0.0365556	0.102347	NA
	known locus	RRBE1	rs675209	6	7047083	21	C	-0.0398093	0.019905	-0.0448552	0.024597	0.872532	NA
	known locus	SLC17A1-A3	rs1165151	6	25929595	21	G	0.0841725	0.0167783	0.0403429	0.021253	0.103416	NA
	known locus	SLC16A9	rs1171614	10	61139544	21	C	0.0773595	0.0250079	0.0452606	0.0311514	0.418838	NA
	known locus	SLC22A11	rs2078267	11	64090690	20	C	0.0611151	0.0171649	0.0381287	0.0216044	0.401961	NA
	known locus	NRXN2-SLC22A12	rs478607	11	64234639	21	G	0.0425874	0.0230736	0.0689047	0.0307261	0.490813	NA
	known locus	INHBC-INHBE	rs3741414	12	56130316	21	C	0.0618299	0.0216901	0.0797195	0.0268731	0.602234	NA
	known locus	TRIM46	rs11264341	1	153418117	21	C	0.00307115	0.0181311	0.0592367	0.0224187	0.0500087	NA
	known locus	INHBB	rs17050272	2	121022910	19	G	-0.0415164	0.021722	-0.05498	0.0252896	0.684483	NA
	known locus	SFMBT1	rs6770152	3	53075254	21	G	0.0390806	0.0171026	0.0282711	0.0212338	0.689977	NA
	known locus	TMEM171	rs17632159	5	72467238	19	C	-0.0137174	0.01966	-0.0326782	0.0245582	0.544242	NA
	known locus	VEGFA	rs729761	6	43912549	21	G	0.0583169	0.0198326	0.0852819	0.0245006	0.389413	NA
	known locus	BAZ1B-MLXIPL	rs1178977	7	72494985	21	G	-0.0234339	0.0219878	-0.0279102	0.0274664	0.898145	NA
	known locus	PRKAG2	rs10480300	7	151036938	21	C	0.0140809	0.0187254	-0.0264507	0.0235174	0.17494	NA
	known locus	STC1	rs17786744	8	23832951	21	G	-0.00529326	0.0171367	0.0128258	0.0212307	0.504034	NA
	known locus	HNF4G	rs2941484	8	76641323	21	C	-0.0520917	0.0172588	-0.0302965	0.0212924	0.423674	NA
	known locus	A1CF	rs10821905	10	52316099	21	G	-0.0602231	0.0221491	-0.0613688	0.0281384	0.974321	NA
	known locus	ATXN2	rs653178	12	110492139	21	C	0.0531951	0.0172159	0.0359884	0.021473	0.52934	NA
	known locus	UBE2Q2/NRG4	rs1394125	15	73946038	21	G	0.0105644	0.019454	-0.0342649	0.0246549	0.150972	NA
	known locus	IGFR1	rs6598541	15	97088658	21	G	-0.0308741	0.0182263	-0.0339547	0.0226702	0.915145	NA
	known locus	NFAT5	rs7193778	16	68121391	21	C	0.01295	0.0248822	0.0315064	0.0312279	0.640089	NA
	known locus	MAF	rs7188445	16	78292488	21	G	0.0407444	0.0178696	0.031438	0.0225382	0.744782	NA
	known locus	HLF	rs7224610	17	50719787	21	C	0.0151222	0.0172411	0.0647762	0.0214751	0.0696755	NA
	known locus	ACVR1B/ACVRL1	rs7976059	12	50537539	21	G	-0.00433729	0.0183888	-0.0228745	0.0232875	0.529657	NA
	known locus	B3GNT4	rs7953704	12	121191945	21	G	0.0492927	0.0171364	0.0252959	0.0217983	0.383912	NA
OVERWEIGHT-OBESE-All	Candidate locus; MAF >5%	DAB2-PTGER4	rs2939335	5	39618523	21	T	-0.0280652	0.011109	0.0580635	0.015145	3.33203e-06	1
	Candidate locus; MAF >5%	LARGE-ISX	rs5754848	22	32873510	21	G	-0.034784	0.0110233	0.0491356	0.0149001	4.41634e-06	1
	known locus	PDZK1	rs1471633	1	144435096	21	C	-0.0647024	0.011101	-0.0417601	0.0150529	0.213619	NA
	known locus	GCKR	rs1260326	2	27584444	21	C	-0.0549405	0.0111401	-0.0801939	0.015193	0.174133	NA
	known locus	SLC2A9	rs12498742	4	9553150	21	G	-0.26995	0.0128694	-0.299313	0.0174279	0.169383	NA
	known locus	ABCG2	rs2231142	4	89271347	21	G	-0.215342	0.0187484	-0.134653	0.0254206	0.00959664	NA
	known locus	RRBE1	rs675209	6	7047083	21	C	-0.0417495	0.0129934	-0.0418011	0.0171431	0.998058	NA
	known locus	SLC17A1-A3	rs1165151	6	25929595	21	G	0.0834888	0.0109509	0.0518292	0.0149543	0.0833139	NA
	known locus	SLC16A9	rs1171614	10	61139544	21	C	0.0706792	0.0163614	0.0648111	0.0214281	0.825316	NA
	known locus	SLC22A11	rs2078267	11	64090690	20	C	0.0714371	0.011143	0.0417562	0.0151384	0.109391	NA
	known locus	NRXN2-SLC22A12	rs478607	11	64234639	21	G	0.0706924	0.0150795	0.0310809	0.0213837	0.124883	NA
	known locus	INHBC-INHBE	rs3741414	12	56130316	21	C	0.0754169	0.0138471	0.0734029	0.0190002	0.930791	NA
	known locus	TRIM46	rs11264341	1	153418117	21	C	0.0325646	0.0117347	0.0642881	0.0157143	0.100985	NA
	known locus	INHBB	rs17050272	2	121022910	20	G	-0.0362512	0.0132875	-0.0422513	0.0171686	0.779272	NA
	known locus	SFMBT1	rs6770152	3	53075254	21	G	0.0329451	0.0111105	0.0209902	0.0150411	0.516856	NA
	known locus	TMEM171	rs17632159	5	72467238	20	C	-0.0230133	0.0123487	-0.0210516	0.0165174	0.923163	NA
	known locus	VEGFA	rs729761	6	43912549	21	G	0.0320258	0.0128298	0.0546215	0.0172767	0.287042	NA
	known locus	BAZ1B-MLXIPL	rs1178977	7	72494985	21	G	-0.0433759	0.0144147	-0.0550372	0.0194254	0.624985	NA
	known locus	PRKAG2	rs10480300	7	151036938	21	C	-0.012076	0.012233	0.00503983	0.0165284	0.398702	NA
	known locus	STC1	rs17786744	8	23832951	21	G	0.0135113	0.0110743	-0.00559635	0.0149237	0.297179	NA
	known locus	HNF4G	rs2941484	8	76641323	21	C	-0.0405256	0.0112817	-0.0331828	0.0150782	0.692575	NA
	known locus	A1CF	rs10821905	10	52316099	21	G	-0.0430652	0.0144341	-0.0420945	0.0200976	0.968274	NA
	known locus	ATXN2	rs653178	12	110492139	21	C	0.0212545	0.0112695	0.0309431	0.0151043	0.602166	NA
	known locus	UBE2Q2/NRG4	rs1394125	15	73946038	21	G	-0.0302414	0.0128044	-0.0751434	0.0172959	0.0343802	NA
	known locus	IGFR1	rs6598541	15	97088658	21	G	-0.0320403	0.0117859	-0.0196938	0.0158766	0.526662	NA
	known locus	NFAT5	rs7193778	16	68121391	21	C	0.000426792	0.0159875	0.0121024	0.0218388	0.661845	NA
	known locus	MAF	rs7188445	16	78292488	21	G	0.015692	0.0117217	0.0283264	0.0157323	0.513776	NA
	known locus	HLF	rs7224610	17	50719787	21	C	0.0269054	0.0112327	0.062463	0.0150812	0.0552072	NA
	known locus	ACVR1B/ACVRL1	rs7976059	12	50537539	21	G	-0.0284468	0.0118436	-0.0315735	0.0161885	0.874423	NA
	known locus	B3GNT4	rs7953704	12	121191945	21	G	0.026158	0.0112086	0.0303125	0.0151051	0.822795	NA
